# Supplementary material for: Emergomycosis, an Emerging Thermally Dimorphic Fungal Infection: A Systematic Review
Source: MDPI journal article supplement (doi:10.3390/jof9101039), 2023-10-23
Supplement: s1 [file s1]

Table S1. Clinical manifestations in emergomycosis patients

| Signs and symptoms          | Total<br>N (%) | HIV-Infected patients<br>N (%) | HIV-uninfected patients<br>N (%) | P value |
|-----------------------------|----------------|--------------------------------|----------------------------------|---------|
| Fever                       | 46 (59.7)      | 38 (49.4)                      | 8 (10.4)                         | 0.403   |
| Loss of weight              | 36 (46.8)      | 32 (41.6)                      | 4 (5.2)                          | 0.089   |
| Cough                       | 35 (45.5)      | 29 (37.7)                      | 6 (7.8)                          | 0.577   |
| Dyspnoea                    | 13 (16.9)      | 7 (9.1)                        | 6 (7.8)                          | 0.023*  |
| Tachypnoea                  | 8 (10.4)       | 7 (9.1)                        | 1 (1.3)                          | >0.99   |
| Night sweats                | 10 (13)        | 10 (13)                        | 0                                | 0.110   |
| Haemoptysis                 | 3 (3.9)        | 3 (3.9)                        | 0                                | >0.99   |
| Diarrhoea                   | 14 (18.2)      | 12 (15.6)                      | 2 (2.6)                          | 0.721   |
| Generalised lymphadenopathy | 8 (10.4)       | 6 (7.8)                        | 2 (2.6)                          | 0.668   |
| Hepatomegaly                | 6 (7.8)        | 6 (7.8)                        | 0                                | 0.334   |
| Skin lesions                | 65 (84.4)      | 58 (75.3)                      | 7 (9.1)                          | 0.0001* |

**Note:** The values in the table are expressed in N (number) and % (percentage). The percentages in the table were calculated using the total number of patients (N=77) as the denominator.

\*The P values <0.05 were considered statistically significant.

Table S2. Opportunistic infections in emergomycosis patients

| Infections                               | Total<br>N (%) | HIV-Infected patients<br>N (%) | HIV-uninfected patients<br>N (%) | P value |
|------------------------------------------|----------------|--------------------------------|----------------------------------|---------|
| <i>Opportunistic Infections</i>          | 29 (37.7)      | 26 (33.8)                      | 3 (3.9)                          | 0.092   |
| <i>Fungal Infections</i>                 | 11 (14.3)      | 10 (13.0)                      | 1 (1.3)                          | 0.442   |
| Aspergillosis                            | 1 (1.3)        | 0                              | 1 (1.3)                          | 0.208   |
| Candidiasis                              | 6 (7.8)        | 6 (7.8)                        | 0                                | 0.334   |
| Cryptococcosis                           | 1 (1.3)        | 1 (1.3)                        | 0                                | >0.99   |
| Histoplasmosis                           | 3 (3.9)        | 3 (3.9)                        | 0                                | >0.99   |
| <i>Bacterial Infections</i>              | 15 (19.5)      | 13 (16.9)                      | 2 (2.6)                          | 0.723   |
| <i>Mycobacterium tuberculosis</i>        | 4 (5.2)        | 4 (5.2)                        | 0                                | 0.574   |
| Syphilis                                 | 1 (1.3)        | 1 (1.3)                        | 0                                | >0.99   |
| Non-tuberculous mycobacteria             | 5 (6.5)        | 5 (6.5)                        | 0                                | 0.577   |
| Bacteremia                               | 6 (7.8)        | 4 (5.2)                        | 2 (2.6)                          | 0.599   |
| <i>Viral infections (other than HIV)</i> | 9 (11.7)       | 8 (10.4)                       | 1 (1.3)                          | 0.675   |
| Parvovirus                               | 1 (1.3)        | 1 (1.3)                        | 0                                | >0.99   |
| Kaposi sarcoma                           | 1 (1.3)        | 1 (1.3)                        | 0                                | >0.99   |
| Herpes virus                             | 3 (3.9)        | 3 (3.9)                        | 0                                | >0.99   |
| Hepatitis B and C virus                  | 3 (3.9)        | 3 (3.9)                        | 0                                | >0.99   |
| Cytomegalovirus                          | 1 (1.3)        | 0                              | 1 (1.3)                          | 0.208   |

**Note:** The values in the table are expressed in N (number) and % (percentage). The percentages in the table were calculated using the total number of patients (N=77) as the denominator.

The P values <0.05 were considered statistically significant.

Table S3. Descriptions of skin lesions in emergomycosis patients

| Appearances of skin lesions     | Total<br>N (%) | HIV-Infected patients<br>N (%) | HIV-uninfected patients<br>N (%) | P value |
|---------------------------------|----------------|--------------------------------|----------------------------------|---------|
| <i>Skin lesions<sup>a</sup></i> | 65 (84.4)      | 58 (75.3)                      | 7 (9.1)                          | 0.0001* |
| Papules                         | 32 (41.6)      | 28 (36.4)                      | 4 (5.2)                          | 0.162   |
| Nodules                         | 17 (22.1)      | 13 (16.9)                      | 4 (5.2)                          | 0.743   |
| Crust                           | 15 (19.5)      | 13 (16.9)                      | 2 (2.6)                          | 0.723   |
| Ulceration                      | 12 (15.6)      | 9 (11.7)                       | 3 (3.9)                          | 0.706   |
| Plaques                         | 11 (14.3)      | 10 (13)                        | 1 (1.3)                          | 0.442   |
| Macules/Patches                 | 11 (14.3)      | 11 (14.3)                      | 0                                | 0.107   |
| Erythema                        | 10 (13)        | 10 (13)                        | 0                                | 0.110   |
| Verrucous                       | 5 (6.5)        | 5 (6.5)                        | 0                                | 0.577   |
| Dry Scales                      | 4 (5.2)        | 4 (5.2)                        | 0                                | 0.574   |

**Note:** The values in the table are expressed in N (number) and % (percentage). The percentages in the table were calculated using the total number of patients (N=77) as the denominator.

\*The P values <0.05 were considered statistically significant.

<sup>a</sup>. The descriptions of the skin lesions were reported in n=54 patients (HIV-infected (n=48) and HIV-uninfected (n=6)).

Table S4. Radiological findings in emergomycosis patients

| Radiological findings                                    | Total<br>N (%)   | HIV-Infected patients<br>N (%) | HIV-uninfected patients<br>N (%) | P value       |
|----------------------------------------------------------|------------------|--------------------------------|----------------------------------|---------------|
| <i>Radiological findings of chest <sup>a</sup></i>       | <i>58 (75.3)</i> | <i>44 (57.1)</i>               | <i>14 (18.2)</i>                 | <i>0.330</i>  |
| Lung opacities and infiltrates                           | 46 (59.7)        | 32 (41.6)                      | 14 (18.2)                        | 0.011*        |
| Hilar lymphadenopathy                                    | 19 (24.7)        | 16 (20.8)                      | 3 (3.9)                          | 0.747         |
| Lung collapse                                            | 4 (5.2)          | 3 (3.9)                        | 1 (1.3)                          | >0.99         |
| Pleural effusion                                         | 3 (3.9)          | 2 (2.6)                        | 1 (1.3)                          | 0.508         |
| Lung mass                                                | 3 (3.9)          | 1 (1.3)                        | 2 (2.6)                          | 0.108         |
| Tubercular cavities                                      | 4 (5.2)          | 3 (3.9)                        | 1 (1.3)                          | >0.99         |
| Pericardial effusion                                     | 2 (2.6)          | 2 (2.6)                        | 0                                | >0.99         |
| <i>Radiological findings of the abdomen <sup>a</sup></i> | <i>21 (27.3)</i> | <i>21 (27.3)</i>               | <i>0</i>                         | <i>0.004*</i> |
| Abnormal liver findings                                  | 12 (15.6)        | 12 (15.6)                      | 0                                | 0.062         |
| Splenic Lesions                                          | 6 (7.8)          | 6 (7.8)                        | 0                                | 0.334         |
| Abdominal lymphadenopathy                                | 7 (9.1)          | 7 (9.1)                        | 0                                | 0.334         |
| Abnormal Renal Findings                                  | 2 (2.6)          | 2 (2.6)                        | 0                                | >0.99         |
| Abdominal mass                                           | 2 (2.6)          | 2 (2.6)                        | 0                                | >0.99         |

**Note:** The values in the table are expressed in N (number) and % (percentage). The percentages in the table were calculated using the total number of patients (N=77) as the denominator.

\*The P values <0.05 were considered statistically significant.

<sup>a</sup>. Radiological findings in the chest and abdomen were reported in n=58 and n=21 patients, respectively. Multiple findings were documented in each patient.

Table S5. Antifungal treatment in the emergomycosis patients

| Treatment                                               | Total<br>N (%)   | HIV-Infected patients<br>N (%) | HIV-uninfected patients<br>N (%) | P value      |
|---------------------------------------------------------|------------------|--------------------------------|----------------------------------|--------------|
| Anti-tubercular (ATT) and Anti-retroviral Therapy (ART) |                  |                                |                                  |              |
| ATT for active disease                                  | 4 (5.2)          | 4 (5.2)                        | 0                                | 0.574        |
| ATT empirical treatment                                 | 30 (39)          | 30 (39)                        | 0                                | 0.0001*      |
| On ART during the presentation                          | 30 (39)          | 30 (39)                        | 0                                | 0.0001*      |
| ART newly initiated after diagnosis                     | 23 (29.9)        | 23 (29.9)                      | 0                                | 0.002*       |
| ART default before skin lesions                         | 14 (18.2)        | 14 (18.2)                      | 0                                | 0.034*       |
| Never on ART                                            | 3 (3.9)          | 3 (3.9)                        | 0                                | >0.99        |
| Antifungal Treatment <sup>a</sup>                       |                  |                                |                                  |              |
| Patients on antifungal therapy                          | 64 (83.1)        | 50 (64.9)                      | 14 (18.2)                        | 0.740        |
| No antifungal treatment                                 | 9 (11.7)         | 8 (10.4)                       | 1 (1.3)                          | 0.740        |
| Amphotericin B alone                                    | 8 (10.4)         | 7 (9.1)                        | 1 (1.3)                          | >0.99        |
| <i>Triazole alone</i>                                   | <i>19 (24.7)</i> | <i>12 (15.6)</i>               | <i>7 (9.1)</i>                   | <i>0.058</i> |
| Fluconazole alone                                       | 7 (9.1)          | 7 (9.1)                        | 0                                | 0.334        |
| Itraconazole alone                                      | 7 (9.1)          | 3 (3.9)                        | 4 (5.2)                          | 0.031*       |
| Posaconazole alone                                      | 1 (1.3)          | 0                              | 1 (1.3)                          | 0.208        |
| voriconazole alone                                      | 1 (1.3)          | 0                              | 1 (1.3)                          | 0.208        |
| Itraconazole and Fluconazole                            | 2 (2.6)          | 2 (2.6)                        | 0                                | >0.99        |
| Itraconazole, Fluconazole and Posaconazole              | 1 (1.3)          | 0                              | 1 (1.3)                          | 0.208        |
| <i>Amphotericin B and azole combination therapy</i>     | <i>34 (44.2)</i> | <i>30 (39)</i>                 | <i>4 (5.2)</i>                   | <i>0.098</i> |
| Amphotericin B and Itraconazole                         | 24 (31.2)        | 23 (29.9)                      | 1 (1.3)                          | 0.016*       |
| Amphotericin B and Fluconazole                          | 5 (6.5)          | 4 (5.2)                        | 1 (1.3)                          | >0.99        |
| Amphotericin B, Itraconazole and Fluconazole            | 4 (5.2)          | 3 (3.9)                        | 1 (1.3)                          | >0.99        |
| Amphotericin B, Voriconazole and Fluconazole            | 1 (1.3)          | 0                              | 1 (1.3)                          | 0.208        |
| <i>Amphotericin B, azoles and echinocandins</i>         | <i>3 (3.9)</i>   | <i>1 (1.3)</i>                 | <i>2 (2.6)</i>                   | <i>0.108</i> |

|                                                           |         |         |         |       |
|-----------------------------------------------------------|---------|---------|---------|-------|
| Amphotericin B, Posaconazole and Caspofungin              | 1 (1.3) | 0       | 1 (1.3) | 0.208 |
| Amphotericin B, Voriconazole and Caspofungin              | 1 (1.3) | 0       | 1 (1.3) | 0.208 |
| Amphotericin B, Itraconazole, Fluconazole and Caspofungin | 1 (1.3) | 1 (1.3) | 0       | >0.99 |

**Note:** The values in the table are expressed in N (number) and % (percentage). The percentages in the table were calculated using the total number of patients (N=77) as the denominator.

\*The P values <0.05 were considered statistically significant.

<sup>a</sup>. Antifungal treatment data was available in 73 cases. Four patients did not have treatment data [10,30].
